# Supplementary material for: Nanoparticle induced barrier function assessment at liquid–liquid and air–liquid interface in novel human lung epithelia cell lines
Source: PubMed Central journal article supplement — Toxicol Res (Camb). 2019 Nov 19;8(6):1016–27. doi: 10.1039/c9tx00179d (PMC7021197; doi:10.1039/c9tx00179d), 2019-11-19
Supplement: TX-008-C9TX00179D-s001.pdf [file TX-008-C9TX00179D-s001.pdf]

MilliQ

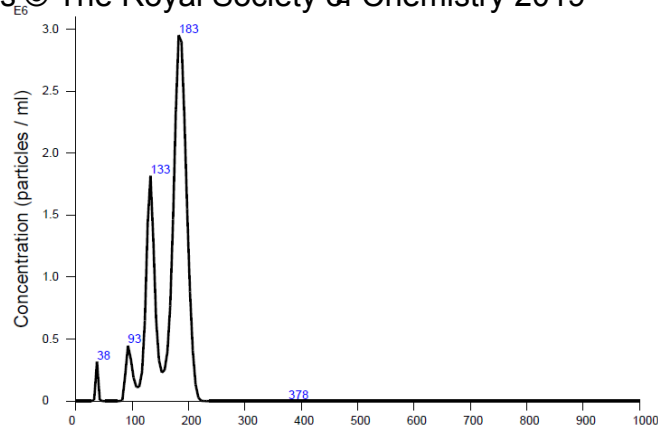

DMEM

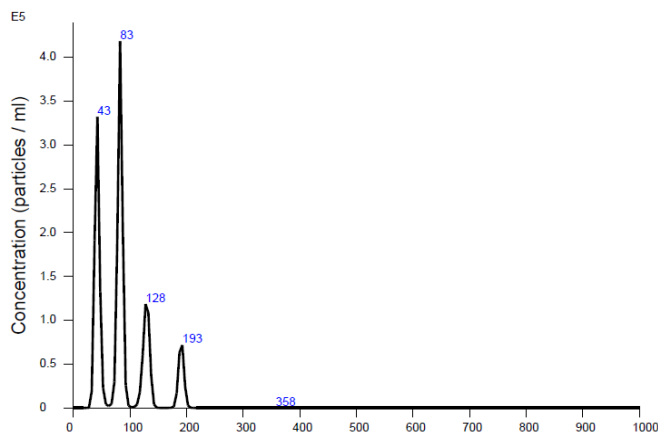

huAEC  
Medium

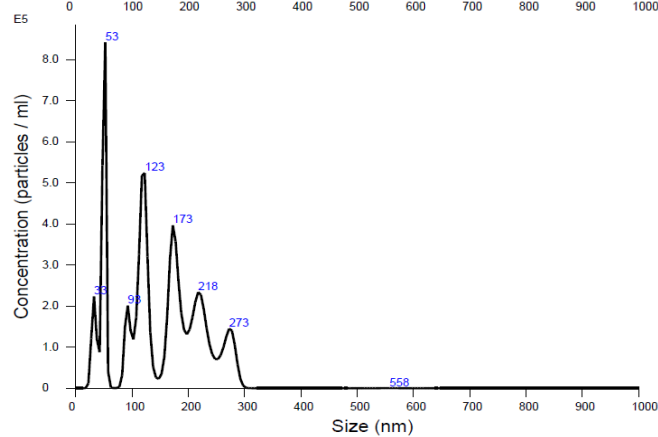

ZnO

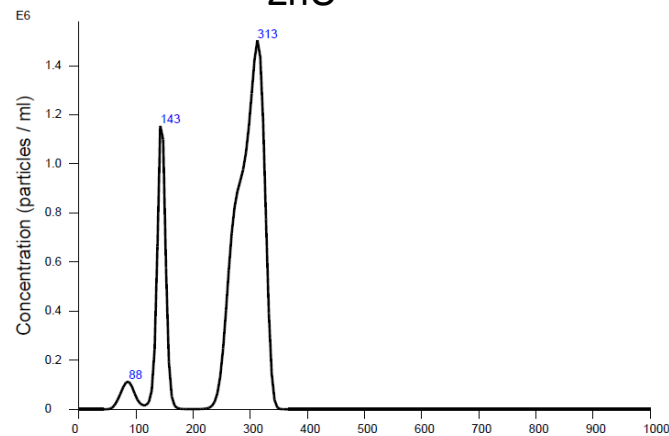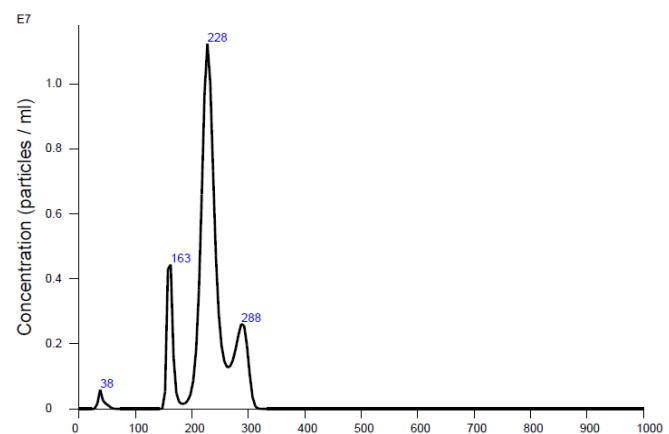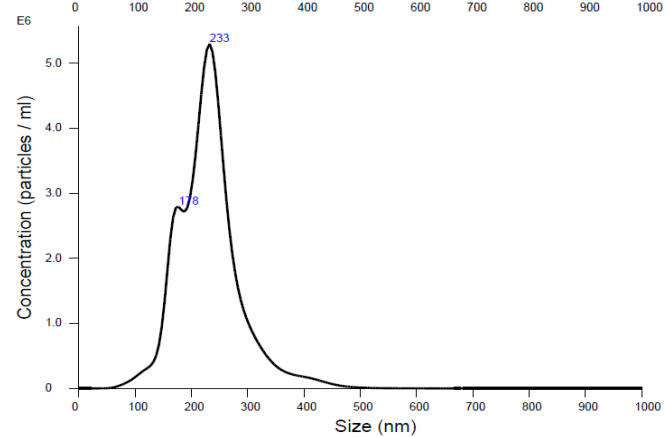

Supplemental figure 1: Particle size distribution of CeO<sub>2</sub> and ZnO NPs analyzed by NTA.

CeO<sub>2</sub>

Size Distribution by Intensity

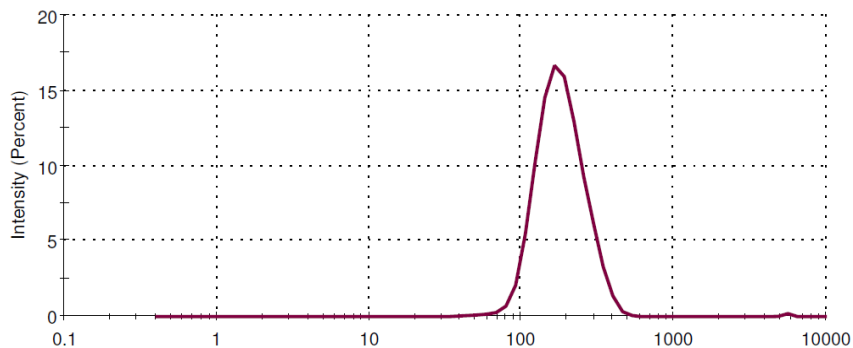

MilliQ

ZnO

Size Distribution by Intensity

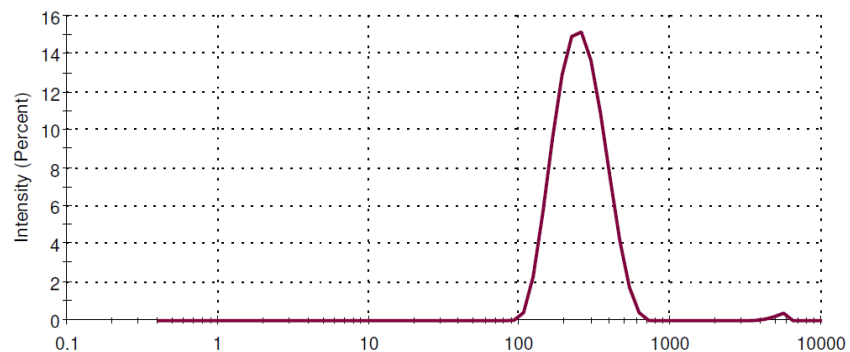

DMEM

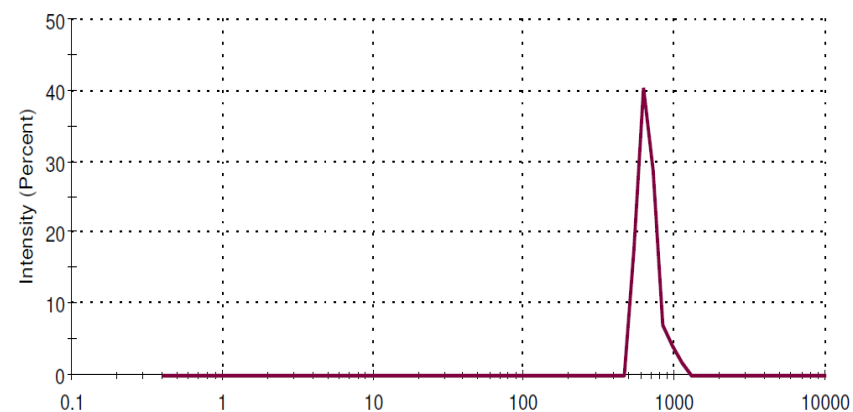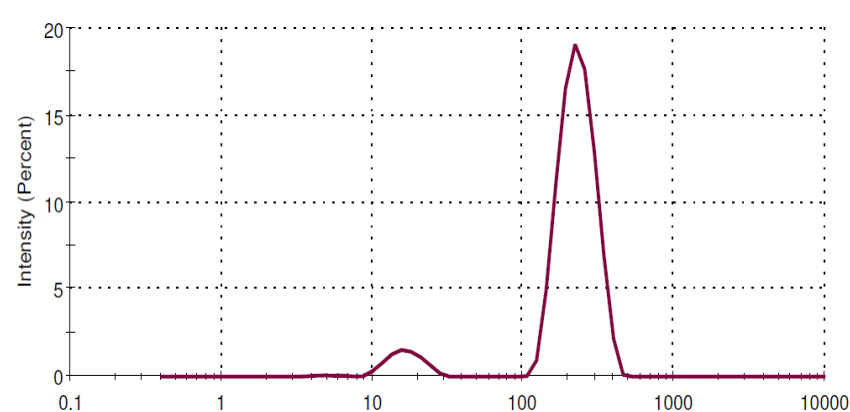

huAEC  
Medium

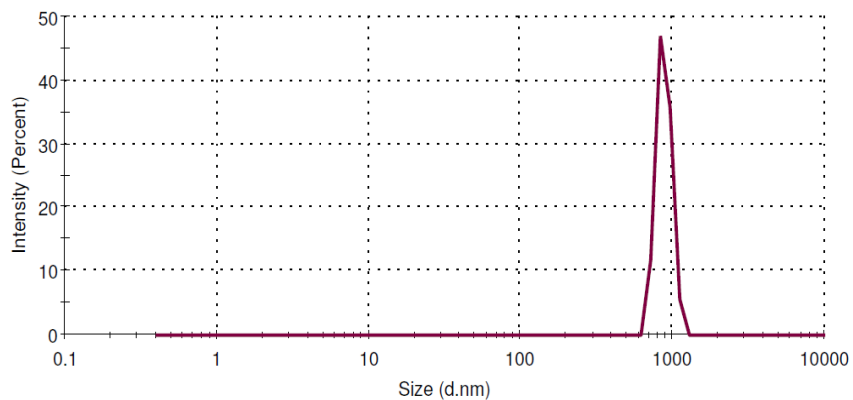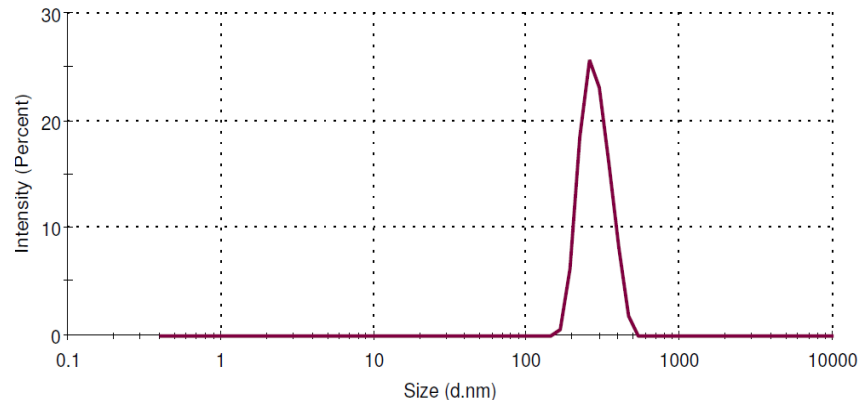

Supplemental figure 2: Particle size distribution of CeO<sub>2</sub> and ZnO NPs analyzed by DLS.
